# Supplementary material
Source: HighWire-hosted journal article supplement (https://erj.ersjournals.com/content/52/3/1800754)
Supplement: inline-supplementary-material-1 [file inline-supplementary-material-1.pdf]

**Supplementary Table S1: Demographic characteristics by diagnosis**

| Patient characteristics          | ALS      | Cerebral palsy | Guillian Barre | Metabolic Disorders | Multiple sclerosis | Diagnostic category |                   | NMD         | Neuropathy | Post-polio | Spina bifida | SMA      |
|----------------------------------|----------|----------------|----------------|---------------------|--------------------|---------------------|-------------------|-------------|------------|------------|--------------|----------|
| Total                            | 864      | 8,118          | 1,055          | 1,319               | 36,623             | Muscular dystrophy  | Myasthenia gravis | 94,739      | 1,382      | < 6        | 3,062        | 30       |
| Age (years)                      |          |                |                |                     |                    |                     |                   |             |            |            |              |          |
| mean (SD)                        | 71 (12)  | 42 (17)        | 57 (18)        | 65 (17)             | 47 (14)            | 53 (18)             | 53 (17)           | 54 (16)     | 62 (18)    | 53 (7)     | 41 (17)      | 50 (20)  |
| Sex                              |          |                |                |                     |                    |                     |                   |             |            |            |              |          |
| Female                           | 354 (41) | 4,016 (50)     | 463 (44)       | 657 (50)            | 26317 (72)         | 4,740 (54)          | 16,665 (56)       | 54,013 (57) | 652 (47)   | < 6 (60)   | 2026 (66)    | 13 (43)  |
| Male                             | 510 (59) | 4,102 (51)     | 592 (56)       | 662 (50)            | 10306 (28.)        | 4,067 (47)          | 12917 (44)        | 40,726 (43) | 730 (53)   | < 6 (40)   | 1036 (34)    | 17 (57)  |
| Neighbourhood Income Quintile    |          |                |                |                     |                    |                     |                   |             |            |            |              |          |
| 1                                | 194 (23) | 1,976 (24)     | 196 (19)       | 286 (22)            | 6695 (18)          | 1911 (22)           | 5,931 (20)        | 17,350 (18) | 310 (23)   | < 6 (20)   | 742 (24)     | 11 (37)  |
| 2                                | 183 (21) | 1,667 (21)     | 215 (21)       | 307 (23)            | 7049 (19)          | 1833 (21)           | 6,291 (21)        | 18,406 (20) | 282 (21)   |            | 645 (21)     | 6 (20)   |
| 3                                | 175 (20) | 1,545 (19)     | 217 (21)       | 269 (21)            | 7202 (20)          | 1784 (20)           | 6,222 (21)        | 18,271 (19) | 251 (19)   | < 6(20)    | 547 (18)     | < 6 (13) |
| 4                                | 153 (18) | 1,535 (19)     | 202 (19)       | 232 (18)            | 7567 (21)          | 1722 (20)           | 5,642 (19)        | 19,792 (21) | 255 (19)   | < 6 (40)   | 568 (19)     | < 6 (7)  |
| 5                                | 155 (18) | 1,365 (17)     | 221 (21)       | 221 (17)            | 8005 (22)          | 1524 (17)           | 5,433 (18)        | 20,649 (22) | 277 (20)   | < 6 (20)   | 548 (18)     | 7 (23)   |
| Rural Residence                  |          |                |                |                     |                    |                     |                   |             |            |            |              |          |
| No                               | 739 (86) | 7,107 (88)     | 892 (85)       | 1,049 (80)          | 32,109 (88)        | 7549 (86)           | 26,787 (91)       | 84,751 (90) | 1,163 (84) | < 6 (80)   | 2703 (88)    | 26 (87)  |
| Yes                              | 125 (15) | 1,001 (12)     | 163 (16)       | 269 (20)            | 4,490 (12)         | 1253 (14)           | 2786 (9)          | 9,937 (11)  | 218 (16)   | < 6 (20)   | 357 (12)     | < 6 (13) |
| Immigration Status               |          |                |                |                     |                    |                     |                   |             |            |            |              |          |
| Citizen                          | 812 (94) | 7,619 (94)     | 976 (93)       | 1,258 (95)          | 34,314 (94)        | 8121 (92)           | 25,746 (87)       | 86,556 (91) | 13,18 (95) | < 6 (100)  | 2752 (90)    | 27 (90)  |
| Immigration                      | 44 (5)   | 393 (5)        | 69 (7)         | 45 (3)              | 1,894 (5)          | 551 (6)             | 3,104 (11)        | 6,511 (7)   | 54 (4)     | -          | 249 (8)      | < 6 (10) |
| Refugee                          | 8 (1)    | 106 (1)        | 10 (1)         | 16 (1)              | 412 (1)            | 135 (2)             | 732 (3)           | 1,664 (2)   | 10 (1)     | -          | 61 (2)       |          |
| Comorbidity                      |          |                |                |                     |                    |                     |                   |             |            |            |              |          |
| COPD                             | 264 (31) | 601 (7)        | 189 (18)       | 439 (33)            | 2,708 (7)          | 1247 (14)           | 3,521 (12)        | 12,599 (13) | 351 (25)   | < 6 (40)   | 234 (8)      | 7 (23)   |
| Asthma                           | 133 (15) | 1068 (13)      | 169 (16)       | 226 (17)            | 4,861 (13)         | 1347 (15)           | 4,357 (15)        | 15,841 (17) | 237 (17)   | < 6 (20)   | 475 (16)     | < 6 (17) |
| CHF                              | 134 (16) | 216 (3)        | 98 (9)         | 394 (30)            | 703 (2)            | 594 (7)             | 1,216 (4)         | 4,618 (5)   | 252 (18)   |            | 81 (3)       | < 6 (13) |
| Charlson Comorbidity Index (CCI) |          |                |                |                     |                    |                     |                   |             |            |            |              |          |
| 0                                | 369 (46) | 1513 (65)      | 598 (61)       | 342 (27)            | 5,892 (72)         | 1378 (53)           | 3906 (60)         | 13,102 (55) | 511 (42)   | < 6 (40)   | 730 (69)     | 17 (59)  |
| 1 (1 to 3)                       | 361 (45) | 692 (30)       | 321 (33)       | 666 (52)            | 1,996 (24)         | 974 (37)            | 2194 (34)         | 8,862 (37)  | 522 (42)   | < 6 (60)   | 270 (26)     | 10 (35)  |

|                |        |         |        |          |         |          |         |           |          |   |        |         |
|----------------|--------|---------|--------|----------|---------|----------|---------|-----------|----------|---|--------|---------|
| 2 ( $\geq 4$ ) | 66 (8) | 114 (5) | 63 (6) | 273 (21) | 282 (4) | 258 (10) | 388 (6) | 1,944 (8) | 197 (16) | - | 55 (5) | < 6 (7) |
|----------------|--------|---------|--------|----------|---------|----------|---------|-----------|----------|---|--------|---------|

Note: some percentages may not sum to 100 due to rounding. ALS: amyotrophic lateral sclerosis; NMD: neuromuscular disease (other); SMA: spinal muscular atrophy; SD: standard deviation; COPD: chronic obstructive pulmonary disease; CHF: congestive heart failure.

**Supplementary Table S2: Healthcare utilization for ALS/MND and muscular dystrophy**

| ALS/MND (n = 864); Muscular dystrophy (n = 8,807) | n (%) patients | Overall visits per individual | Number of visits per three years per individual <sup>b</sup> |             |             |             |
|---------------------------------------------------|----------------|-------------------------------|--------------------------------------------------------------|-------------|-------------|-------------|
|                                                   |                |                               | 2003-2005                                                    | 2006-2008   | 2009-2011   | 2012-2014   |
| Respiratory related ED visits                     |                |                               |                                                              |             |             |             |
| ALS/MND                                           | 188 (21.76)    | 1.7 (1.2); 1 (1,2)            | 1.6 (1.1)                                                    | 1.4 (0.9)   | 1.4 (0.8)   | 1.4 (0.6)   |
| Muscular dystrophy                                | 2173 (24.67)   | 2.2 (2.9); 1 (1,2)            | 1.6 (1.5)                                                    | 1.6 (1.4)   | 1.6 (1.3)   | 1.7 (1.6)   |
| Respiratory related hospital admission            |                |                               |                                                              |             |             |             |
| ALS/MND                                           | 144 (16.67)    | 1.4 (1); 1 (1,1)              | 1.3 (0.9)                                                    | 1.2 (0.6)   | 1.4 (0.7)   | 1 (0)       |
| Muscular dystrophy                                | 1008 (11.45)   | 1.8 (1.8); 1 (1,2)            | 1.5 (0.9)                                                    | 1.4 (1.1)   | 1.5 (1)     | 1.5 (1.4)   |
| Pulmonology outpatient clinic                     |                |                               |                                                              |             |             |             |
| ALS/MND                                           | 213 (24.7)     | 22 (83); 3 (1,8)              | 11.7 (29.7)                                                  | 20.8 (58.1) | 20.7 (62.2) | 17 (50.1)   |
| Muscular dystrophy                                | 3008 (34.2)    | 10.9 (53.8); 3 (1,7)          | 6.3 (21.8)                                                   | 6.1 (23.3)  | 7.5 (28.1)  | 7.5 (27.9)  |
| Hospital pulmonology consult                      |                |                               |                                                              |             |             |             |
| ALS/MND                                           | 147 (17)       | 15.8 (75.4); 3 (1,9)          | 9.5 (17.3)                                                   | 14.2 (39.1) | 22.2 (68.8) | 24.8 (73.6) |
| Muscular dystrophy                                | 499 (5.7)      | 14.7 (74.6); 3 (2,9)          | 10.6 (22.5)                                                  | 11.5 (35.7) | 12.5 (45)   | 12.1 (41.5) |
| Pulmonary function tests                          |                |                               |                                                              |             |             |             |
| ALS/MND                                           | 144 (16.7)     | 2.9 (3); 2 (1,3)              | 2.1 (2.5)                                                    | 2.5 (2)     | 1.9 (1.3)   | 2.1 (1.5)   |
| Muscular dystrophy                                | 3171 (36)      | 3.8 (6.5); 2 (1,4)            | 1.9 (2)                                                      | 2.4 (5.2)   | 2.5 (3.3)   | 2.3 (2.2)   |
| Sleep studies                                     |                |                               |                                                              |             |             |             |
| ALS/MND                                           | 32 (3.7)       | 1.5 (0.7); 1 (1,2)            | 1.4 (0.5)                                                    | 1.4 (0.6)   | 1.3 (0.6)   | 1 (0)       |
| Muscular dystrophy                                | 1205 (13.7)    | 1.9 (1.4); 2 (1,2)            | 1.5 (0.6)                                                    | 1.6 (1)     | 1.4 (0.6)   | 1.4 (0.6)   |
| Outpatient clinic (non-pulmonology)               |                |                               |                                                              |             |             |             |
| ALS/MND                                           | 266 (30.8)     | 56.6 (139.4); 20.5 (5,61)     | 30.9 (59.6)                                                  | 34.7 (74.6) | 42.2 (73.7) | 43.2 (74.4) |
| Muscular dystrophy                                | 7864 (89.3)    | 84.3 (76.6); 65 (35,110)      | 22.1 (26)                                                    | 25.8 (26.4) | 30 (29.4)   | 28.3 (28.4) |
| Hospital consult (non-pulmonology)                |                |                               |                                                              |             |             |             |
| ALS/MND                                           | 586 (67.8)     | 27.5 (38.3); 15 (6,35)        | 20.2 (22.9)                                                  | 20.1 (22.9) | 18.1 (28.7) | 25 (49.9)   |

|                              |              |                       |             |             |             |            |
|------------------------------|--------------|-----------------------|-------------|-------------|-------------|------------|
| Muscular dystrophy           | 914 (10.4)   | 21.5 (35.6); 7 (2,25) | 13.8 (22.9) | 13.4 (23.5) | 11.5 (19.8) | 12 (22.4)  |
| All cause ED visits          |              |                       |             |             |             |            |
| ALS/MND                      | 513 (59.38)  | 5.1 (6.3); 3 (1,6)    | 3.3 (3.1)   | 3.1 (3.2)   | 3.7 (4.4)   | 4 (4.9)    |
| Muscular dystrophy           | 7344 (83.39) | 7.2 (17.6); 4 (2,8)   | 3.1 (5.0)   | 3.4 (7.5)   | 3.6 (9)     | 3.5 (4.9)  |
| All cause hospital admission |              |                       |             |             |             |            |
| ALS/MND                      | 496 (57.41)  | 2.6 (2.9); 2 (1,3)    | 1.9 (1.5)   | 1.9 (1.8)   | 2.05 (1.7)  | 2.06 (2.3) |
| Muscular dystrophy           | 4965 (56.38) | 3 (3); 2 (1,4)        | 1.9 (1.7)   | 1.9 (1.6)   | 1.97 (1.7)  | 1.98 (1.6) |
| ICU admission                |              |                       |             |             |             |            |
| ALS/MND                      | 146 (16.9)   | 1.8 (1.7); 1 (1,2)    | 1.5 (1.1)   | 2.1 (2)     | 1.8 (1.5)   | 1.3 (0.8)  |
| Muscular dystrophy           | 1692 (19.21) | 1.7 (1.4); 1 (1,2)    | 1.6 (1.3)   | 1.5 (1)     | 1.6 (1.2)   | 1.6 (1.2)  |

a Values are mean (standard deviation); median (interquartile range) during cohort follow up.

b Calculated for individuals in the cohort requiring these services within each three-year time period.

ED: Emergency department; ICU: intensive care unit.
